# Supplementary material for: Prevalence, Patterns, Association with Biofilm Formation, Effects on Milk Quality and Risk Factors for Antibiotic Resistance of Staphylococci from Bulk-Tank Milk of Goat Herds
Source: MDPI journal article supplement (doi:10.3390/antibiotics10101225), 2021-10-08
Supplement: s1 [file s1]

# **Prevalence, Patterns, Association with Biofilm Formation, Effects on Milk Quality and Risk Factors for Antibiotic Resistance of Staphylococci from Bulk-Tank Milk of Goat Herds**

Daphne T. Lianou, Efthymia Petinaki, Peter J. Cripps, Charalambia K. Michael, Dimitris A. Gougoulis, Katerina Tsilipounidaki, Anargyros Skoulakis, Angeliki I. Katsafadou, Natalia G.C. Vasileiou, Eleni I. Katsarou, Chrysoula Voidarou, Vasia S. Mavrogianni, Mariangela Caroprese and George C. Fthenakis

**Table S1.** Frequency of susceptibility / resistance to individual antibiotics <sup>1</sup> of staphylococcal isolates recovered from bulk-tank milk of 119 goat herds in Greece

|                         | n  | AMP | AZI | CXI | CIP | CLA | CLI | ERY | FOS | FUS | GEN | MOX | MUP | OXA | PEN | RIF | TEI | TET | TOB | SXT |
|-------------------------|----|-----|-----|-----|-----|-----|-----|-----|-----|-----|-----|-----|-----|-----|-----|-----|-----|-----|-----|-----|
| <i>S. aureus</i>        | 21 | 3   | 0   | 0   | 0   | 0   | 1   | 0   | 0   | 0   | 0   | 0   | 0   | 1   | 3   | 0   | 0   | 2   | 1   | 0   |
| <i>S. equorum</i>       | 11 | 8   | 0   | 0   | 0   | 0   | 6   | 8   | 7   | 0   | 0   | 0   | 0   | 1   | 8   | 0   | 0   | 2   | 0   | 0   |
| <i>S. simulans</i>      | 9  | 1   | 0   | 0   | 0   | 0   | 0   | 0   | 0   | 0   | 0   | 0   | 0   | 0   | 1   | 0   | 0   | 0   | 0   | 0   |
| <i>S. capitis</i>       | 6  | 5   | 0   | 0   | 0   | 0   | 1   | 0   | 5   | 0   | 0   | 0   | 0   | 0   | 5   | 0   | 0   | 2   | 0   | 0   |
| <i>S. lentus</i>        | 5  | 2   | 0   | 0   | 0   | 0   | 2   | 0   | 0   | 1   | 0   | 0   | 0   | 2   | 2   | 0   | 0   | 1   | 0   | 0   |
| <i>S. haemolyticus</i>  | 4  | 0   | 0   | 0   | 0   | 0   | 0   | 0   | 0   | 0   | 0   | 0   | 0   | 0   | 0   | 0   | 1   | 0   | 0   | 0   |
| <i>S. vitulinus</i>     | 4  | 4   | 0   | 0   | 0   | 0   | 4   | 4   | 2   | 0   | 0   | 0   | 0   | 1   | 4   | 0   | 0   | 0   | 0   | 0   |
| <i>S. kloosii</i>       | 3  | 2   | 0   | 0   | 0   | 0   | 2   | 1   | 1   | 1   | 0   | 0   | 0   | 1   | 2   | 0   | 0   | 1   | 0   | 0   |
| <i>S. pettenkoferi</i>  | 3  | 1   | 0   | 0   | 0   | 0   | 0   | 1   | 3   | 0   | 0   | 0   | 0   | 0   | 1   | 0   | 0   | 0   | 0   | 0   |
| <i>S. cohnii</i>        | 2  | 1   | 0   | 0   | 0   | 0   | 1   | 0   | 1   | 1   | 0   | 0   | 0   | 0   | 1   | 0   | 0   | 0   | 0   | 0   |
| <i>ssp. urealyticum</i> |    |     |     |     |     |     |     |     |     |     |     |     |     |     |     |     |     |     |     |     |
| <i>S. lugdunensis</i>   | 2  | 2   | 0   | 0   | 0   | 0   | 0   | 0   | 0   | 0   | 0   | 0   | 0   | 0   | 2   | 0   | 0   | 0   | 0   | 0   |
| <i>S. warneri</i>       | 2  | 1   | 0   | 0   | 0   | 0   | 0   | 0   | 2   | 0   | 0   | 0   | 0   | 0   | 1   | 0   | 0   | 2   | 0   | 0   |
| <i>S. xylosus</i>       | 2  | 1   | 0   | 0   | 0   | 0   | 1   | 1   | 0   | 0   | 0   | 0   | 0   | 0   | 1   | 0   | 0   | 0   | 0   | 0   |
| <i>S. auricularis</i>   | 1  | 0   | 0   | 0   | 0   | 0   | 0   | 0   | 0   | 0   | 0   | 0   | 0   | 0   | 0   | 0   | 0   | 0   | 0   | 0   |
| <i>S. chromogenes</i>   | 1  | 0   | 0   | 0   | 0   | 0   | 0   | 0   | 0   | 0   | 0   | 0   | 0   | 0   | 0   | 0   | 0   | 0   | 0   | 0   |
| <i>S. cohnii</i>        | 1  | 1   | 0   | 0   | 0   | 0   | 1   | 1   | 1   | 0   | 0   | 0   | 0   | 0   | 1   | 0   | 0   | 1   | 0   | 0   |
| <i>ssp. cohnii</i>      |    |     |     |     |     |     |     |     |     |     |     |     |     |     |     |     |     |     |     |     |
| <i>S. epidermidis</i>   | 1  | 1   | 0   | 0   | 0   | 0   | 0   | 0   | 0   | 0   | 0   | 0   | 0   | 0   | 1   | 0   | 0   | 1   | 0   | 0   |
| <i>S. hominis</i>       | 1  | 0   | 0   | 0   | 0   | 0   | 0   | 0   | 0   | 0   | 0   | 0   | 0   | 0   | 0   | 0   | 0   | 0   | 0   | 0   |
| <i>S. intermedius</i>   | 1  | 0   | 0   | 0   | 0   | 0   | 0   | 0   | 0   | 0   | 0   | 0   | 0   | 0   | 0   | 0   | 0   | 0   | 0   | 0   |
| Total                   | 80 | 33  | 0   | 0   | 0   | 0   | 19  | 16  | 22  | 3   | 0   | 0   | 0   | 6   | 33  | 0   | 1   | 12  | 1   | 0   |

<sup>1</sup> as established by use of VITEK 2; <sup>2</sup> AMP: ampicillin, AZI: azithromycin, CXI: ceftiofur, CIP: ciprofloxacin, CLA: clarithromycin, CLI: clindamycin, ERY: erythromycin, FOS: fosfomycin, FUS: fusidic acid, GEN: gentamicin, MOX: moxifloxacin, MUP: mupirocin, OXA: oxacillin, PEN: penicillin, RIF: rifampicin, TEI: teicoplanin, TET: tetracycline, TOB: tobramycin, SXT: trimethoprim-sulfamethoxazole.

**Table S2.** Details of associations of antibiotic resistance with biofilm-formation by staphylococcal isolates from the bulk-tank milk of 119 goat herds in Greece.

| Antibiotic      | Proportion of biofilm-forming resistant isolates | <i>p</i> |
|-----------------|--------------------------------------------------|----------|
| All antibiotics | 28/40 (70.0%)                                    | 0.62     |
| Penicillin      | 23/33 (69.7%)                                    | 0.64     |
| Ampicillin      | 21/31 (67.7%)                                    | 0.45     |
| Fosfomycin      | 15/22 (68.2%)                                    | 0.59     |
| Clindamycin     | 11/19 (57.9%)                                    | 0.14     |
| Erythromycin    | 10/16 (62.5%)                                    | 0.32     |
| Tetracycline    | 9/12 (75.0%)                                     | 0.83     |
| Oxacillin       | 3/6 (50.0%)                                      | 0.20     |

**Table S3.** Details of associations of milk quality with isolation of resistant or multi-resistant staphylococcal isolates from the bulk-tank milk of 119 goat herds in Greece.

| Isolation of resistant staphylococcal isolates from the bulk-tank milk ( <i>n</i> = 36)       | No isolation of resistant staphylococcal isolates from the bulk-tank milk ( <i>n</i> = 83)        | <i>p</i> |
|-----------------------------------------------------------------------------------------------|---------------------------------------------------------------------------------------------------|----------|
| Somatic cell counts (cells mL <sup>-1</sup> )                                                 |                                                                                                   |          |
| 0.786 × 10 <sup>6</sup> (95% CI: 0.652 × 10 <sup>6</sup> - 0.948 × 10 <sup>6</sup> )          | 0.862 × 10 <sup>6</sup> (95% CI: 0.764 × 10 <sup>6</sup> - 0.967 × 10 <sup>6</sup> )              | 0.43     |
| Herds with increased somatic cell counts (> 0.750 × 10 <sup>6</sup> cells mL <sup>-1</sup> )  |                                                                                                   |          |
| 22/36 (61.1%)                                                                                 | 55/83 (66.3%)                                                                                     | 0.78     |
| Total bacterial counts (cfu mL <sup>-1</sup> )                                                |                                                                                                   |          |
| 718 × 10 <sup>3</sup> (95% CI: 468 × 10 <sup>3</sup> - 1122 × 10 <sup>3</sup> )               | 530 × 10 <sup>3</sup> (95% CI: 380 × 10 <sup>3</sup> - 724 × 10 <sup>3</sup> )                    | 0.28     |
| Herds with increased total bacterial counts (> 1500 × 10 <sup>3</sup> cfu mL <sup>-1</sup> )  |                                                                                                   |          |
| 12/36 (33.3%)                                                                                 | 17/83 (20.5%)                                                                                     | 0.010    |
| Fat (%)                                                                                       |                                                                                                   |          |
| 4.52 ± 0.17                                                                                   | 4.88 ± 0.14                                                                                       | 0.13     |
| Protein (%)                                                                                   |                                                                                                   |          |
| 3.19 ± 0.03                                                                                   | 3.24 ± 0.04                                                                                       | 0.42     |
| Isolation of multi-resistant staphylococcal isolates from the bulk-tank milk ( <i>n</i> = 19) | No isolation of multi-resistant staphylococcal isolates from the bulk-tank milk ( <i>n</i> = 100) | <i>p</i> |
| Somatic cell counts (cells mL <sup>-1</sup> )                                                 |                                                                                                   |          |
| 0.708 × 10 <sup>6</sup> (95% CI: 0.560 × 10 <sup>6</sup> - 0.897 × 10 <sup>6</sup> )          | 0.866 × 10 <sup>6</sup> (95% CI: 0.775 × 10 <sup>6</sup> - 0.967 × 10 <sup>6</sup> )              | 0.15     |
| Herds with increased somatic cell counts (> 0.750 × 10 <sup>6</sup> cells mL <sup>-1</sup> )  |                                                                                                   |          |
| 10/19 (52.6%)                                                                                 | 67/100 (67.0%)                                                                                    | 0.23     |
| Total bacterial counts (cfu mL <sup>-1</sup> )                                                |                                                                                                   |          |
| 658 × 10 <sup>3</sup> (95% CI: 513 × 10 <sup>3</sup> - 851 × 10 <sup>3</sup> )                | 568 × 10 <sup>3</sup> (95% CI: 436 × 10 <sup>3</sup> - 741 × 10 <sup>3</sup> )                    | 0.68     |
| Herds with increased total bacterial counts (> 1500 × 10 <sup>3</sup> cfu mL <sup>-1</sup> )  |                                                                                                   |          |
| 6/19 (31.6%)                                                                                  | 23/100 (23.0%)                                                                                    | 0.42     |
| Fat (%)                                                                                       |                                                                                                   |          |
| 4.59 ± 0.28                                                                                   | 4.80 ± 0.12                                                                                       | 0.49     |
| Protein (%)                                                                                   |                                                                                                   |          |
| 3.27 ± 0.04                                                                                   | 3.22 ± 0.03                                                                                       | 0.54     |

**Table S4.** Results of univariable analysis for association with isolation of oxacillin-resistant staphylococcal isolates from the bulk-tank milk of 119 goat herds in Greece.

| Isolation of resistant staphylococcal isolates from the bulk-tank milk ( <i>n</i> = 6) |                           |                           |                         | No isolation of resistant staphylococcal isolates from the bulk-tank milk ( <i>n</i> = 113) |                            |                            |                          | <i>p</i> |
|----------------------------------------------------------------------------------------|---------------------------|---------------------------|-------------------------|---------------------------------------------------------------------------------------------|----------------------------|----------------------------|--------------------------|----------|
| Management system applied in the herd                                                  |                           |                           |                         |                                                                                             |                            |                            |                          |          |
| Intensive<br>1                                                                         | Semi-intensive<br>3       | Semi-extensive<br>2       | Extensive<br>0          | Intensive<br>8                                                                              | Semi-intensive<br>26       | Semi-extensive<br>59       | Extensive<br>20          | 0.28     |
| Month into the lactation period at sampling                                            |                           |                           |                         |                                                                                             |                            |                            |                          |          |
| 0–1st<br>0                                                                             | 2nd–5th<br>3              | 6th–9th<br>3              | After 9th<br>0          | 0–1st<br>8                                                                                  | 2nd–5th<br>57              | 6th–9th<br>40              | After 9th<br>8           | 0.76     |
| Machine- or hand-milking                                                               |                           |                           |                         |                                                                                             |                            |                            |                          |          |
| Machine-milking<br>5                                                                   |                           | Hand-milking<br>1         |                         | Machine-milking<br>61                                                                       |                            | Hand-milking<br>52         |                          | 0.16     |
| No. of female goats in the herd                                                        |                           |                           |                         |                                                                                             |                            |                            |                          |          |
| ≤ 165 female goats<br>3                                                                | 166-330 female goats<br>2 | 331-500 female goats<br>0 | > 500 female goats<br>1 | ≤ 165 female goats<br>53                                                                    | 166-330 female goats<br>35 | 331-500 female goats<br>13 | > 500 female goats<br>12 | 0.82     |
| Total milk quantity per female goat obtained during the preceding milking period       |                           |                           |                         |                                                                                             |                            |                            |                          |          |
| ≤ 200 L<br>4                                                                           | 201-400 L<br>2            |                           | > 400 L<br>0            | ≤ 200 L<br>70                                                                               | 201-400 L<br>33            |                            | > 400 L<br>10            | 0.75     |
| Average number of kids born per female goat                                            |                           |                           |                         |                                                                                             |                            |                            |                          |          |
| ≤ 1.50<br>5                                                                            |                           | > 1.50<br>1               |                         | ≤ 1.50<br>97                                                                                |                            | > 1.50<br>16               |                          | 0.86     |
| Collaboration with a veterinarian                                                      |                           |                           |                         |                                                                                             |                            |                            |                          |          |
| Yes<br>5                                                                               |                           | No<br>1                   |                         | Yes<br>96                                                                                   |                            | No<br>17                   |                          | 0.91     |
| Total visits made annually by veterinarians to the herd during the preceding season    |                           |                           |                         |                                                                                             |                            |                            |                          |          |
| ≤ 4<br>3                                                                               | 5 - 7<br>1                |                           | > 7<br>2                | ≤ 4<br>48                                                                                   | 5 - 7<br>24                |                            | > 7<br>41                | 0.93     |
| Clinical mastitis annual incidence risk in the herd                                    |                           |                           |                         |                                                                                             |                            |                            |                          |          |
| ≤ 0.50%<br>1                                                                           |                           | > 0.50%<br>5              |                         | ≤ 0.50%<br>47                                                                               |                            | > 0.50%<br>66              |                          | 0.23     |
| Age of kid removal from their dams                                                     |                           |                           |                         |                                                                                             |                            |                            |                          |          |
| < 45 days<br>0                                                                         | 45–60 days<br>5           |                           | > 60 days<br>1          | < 45 days<br>26                                                                             | 45–60 days<br>39           |                            | > 60 days<br>48          | 0.05     |
| Daily number of milking sessions                                                       |                           |                           |                         |                                                                                             |                            |                            |                          |          |
| 1<br>0                                                                                 | 2<br>6                    | 3<br>0                    | 4<br>0                  | 1<br>4                                                                                      | 2<br>102                   | 3<br>7                     | 4<br>7                   | 0.72     |

|                                                                                               |                                       |                    |                   |                     |                    |
|-----------------------------------------------------------------------------------------------|---------------------------------------|--------------------|-------------------|---------------------|--------------------|
| <b>Duration of the dry-period</b>                                                             |                                       |                    |                   |                     |                    |
| ≤ 2 months                                                                                    |                                       | > 2 months         | ≤ 2 months        | > 2 months          |                    |
| 2                                                                                             |                                       | 4                  | 37                | 76                  | 0.98               |
| <b>Means of calculating live bodyweight for the administration of pharmaceutical products</b> |                                       |                    |                   |                     |                    |
| Weighing                                                                                      |                                       | Estimation         | Weighing          | Estimation          |                    |
| 2                                                                                             |                                       | 4                  | 25                | 88                  | 0.52               |
| <b>Routine overdosing (compared to dose prescribed) of pharmaceuticals</b>                    |                                       |                    |                   |                     |                    |
| Yes                                                                                           |                                       | No                 | Yes               | No                  |                    |
| 2                                                                                             |                                       | 4                  | 24                | 89                  | 0.48               |
| <b>Annual frequency of systemic disinfections in the farm</b>                                 |                                       |                    |                   |                     |                    |
| 0 – 1 occasion                                                                                | 2- 10 occasions                       | > 10 occasions     | 0 – 1 occasion    | 2- 10 occasions     | > 10 occasions     |
| 3                                                                                             | 3                                     | 0                  | 30                | 73                  | 10                 |
|                                                                                               |                                       |                    |                   |                     | 0.40               |
| <b>Routine administration of antimicrobials in newborns</b>                                   |                                       |                    |                   |                     |                    |
| Yes                                                                                           |                                       | No                 | Yes               | No                  |                    |
| 2                                                                                             |                                       | 4                  | 28                | 85                  | 0.64               |
| <b>Vaccination against mastitis</b>                                                           |                                       |                    |                   |                     |                    |
| Yes                                                                                           |                                       | No                 | Yes               | No                  |                    |
| 2                                                                                             |                                       | 4                  | 33                | 80                  | 0.83               |
| <b>Administration of ‘dry-ewe’ treatment at the end of the lactation period</b>               |                                       |                    |                   |                     |                    |
| Yes                                                                                           |                                       | No                 | Yes               | No                  |                    |
| 1                                                                                             |                                       | 5                  | 14                | 99                  | 0.76               |
| <b>Use of teat disinfection after milking</b>                                                 |                                       |                    |                   |                     |                    |
| Yes                                                                                           |                                       | No                 | Yes               | No                  |                    |
| 0                                                                                             |                                       | 6                  | 12                | 101                 | 0.40               |
| <b>Age of the farmer</b>                                                                      |                                       |                    |                   |                     |                    |
| Up to 50 years                                                                                |                                       | Over 50 years      | Up to 50 years    | Over 50 years       |                    |
| 3                                                                                             |                                       | 3                  | 70                | 43                  | 0.56               |
| <b>Length of previous animal farming experience of the farmer</b>                             |                                       |                    |                   |                     |                    |
| ≤ 5 years                                                                                     |                                       | > 5 years          | ≤ 5 years         | > 5 years           |                    |
| 2                                                                                             |                                       | 4                  | 22                | 91                  | 0.41               |
| <b>Education of the farmer</b>                                                                |                                       |                    |                   |                     |                    |
| Primary education                                                                             | Secondary or post-secondary education | Tertiary education | Primary education | Secondary education | Tertiary education |
| 1                                                                                             | 2                                     | 3                  | 19                | 87                  | 7                  |
|                                                                                               |                                       |                    |                   |                     | 0.0007             |

| Farmer by profession                  |    |     |    |       |
|---------------------------------------|----|-----|----|-------|
| Yes                                   | No | Yes | No |       |
| 5                                     | 1  | 100 | 13 | 0.70  |
| Family tradition in farming           |    |     |    |       |
| Yes                                   | No | Yes | No |       |
| 5                                     | 1  | 99  | 14 | 0.76  |
| Presence of working staff in the herd |    |     |    |       |
| Yes                                   | No | Yes | No |       |
| 5                                     | 1  | 29  | 84 | 0.002 |



**Table S5.** Details of multivariable models employed for the evaluation of the isolation of resistant staphylococcal isolates from the bulk-tank milk of 119 goat herds in Greece.

| Outcome                                                                            | Variables offered to the multivariable models ( <i>n</i> ) | Variables required in the final models                                                                                                                                                                                                                                                                      |
|------------------------------------------------------------------------------------|------------------------------------------------------------|-------------------------------------------------------------------------------------------------------------------------------------------------------------------------------------------------------------------------------------------------------------------------------------------------------------|
| Isolation of an oxacillin-resistant staphylococcal isolate from the bulk-tank milk | 4                                                          | (a) education of the farmer, (b) presence of working staff in the herd                                                                                                                                                                                                                                      |
| Isolation of a resistant staphylococcal isolate from the bulk-tank milk            | 13                                                         | (a) clinical mastitis annual incidence risk in the herd, (b) frequency of systemic disinfections in the farm, (c) routine administration of antimicrobials in newborns, (d) length of previous animal farming experience of the farmer, (e) farmer by profession, (f) presence of working staff in the herd |
| Isolation of a multi-resistant staphylococcal isolate from the bulk-tank milk      | 7                                                          | (a) frequency of systemic disinfections in the farm, (b) routine administration of antimicrobials in newborns, (c) farmer by profession, (d) presence of working staff in the herd                                                                                                                          |

**Table S6.** Results of univariable analysis for association with isolation of staphylococcal isolates resistant to at least one antibiotic from the bulk-tank milk of 119 goat herds in Greece.

| Isolation of resistant staphylococcal isolates from the bulk-tank milk ( <i>n</i> = 36) |                            |                           |                         | No isolation of resistant staphylococcal isolates from the bulk-tank milk ( <i>n</i> = 83) |                            |                           |                         | <i>p</i> |
|-----------------------------------------------------------------------------------------|----------------------------|---------------------------|-------------------------|--------------------------------------------------------------------------------------------|----------------------------|---------------------------|-------------------------|----------|
| Management system applied in the herd                                                   |                            |                           |                         |                                                                                            |                            |                           |                         |          |
| Intensive<br>6                                                                          | Semi-intensive<br>12       | Semi-extensive<br>15      | Extensive<br>3          | Intensive<br>3                                                                             | Semi-intensive<br>17       | Semi-extensive<br>46      | Extensive<br>17         | 0.015    |
| Month into the lactation period at sampling                                             |                            |                           |                         |                                                                                            |                            |                           |                         |          |
| 0–1st<br>3                                                                              | 2nd–5th<br>21              | 6th–9th<br>11             | After 9th<br>1          | 0–1st<br>5                                                                                 | 2nd–5th<br>39              | 6th–9th<br>32             | After 9th<br>7          | 0.48     |
| Machine- or hand-milking                                                                |                            |                           |                         |                                                                                            |                            |                           |                         |          |
| Machine-milking<br>23                                                                   |                            | Hand-milking<br>13        |                         | Machine-milking<br>43                                                                      |                            | Hand-milking<br>40        |                         | 0.22     |
| No. of female goats in the herd                                                         |                            |                           |                         |                                                                                            |                            |                           |                         |          |
| ≤ 165 female goats<br>17                                                                | 166-330 female goats<br>11 | 331-500 female goats<br>4 | > 500 female goats<br>4 | ≤ 165 female goats<br>39                                                                   | 166-330 female goats<br>26 | 331-500 female goats<br>9 | > 500 female goats<br>9 | 0.99     |
| Total milk quantity per female goat obtained during the preceding milking period        |                            |                           |                         |                                                                                            |                            |                           |                         |          |
| ≤ 200 L<br>22                                                                           | 201-400 L<br>11            |                           | > 400 L<br>3            | ≤ 200 L<br>52                                                                              | 201-400 L<br>24            |                           | > 400 L<br>7            | 0.98     |
| Average number of kids born per female goat                                             |                            |                           |                         |                                                                                            |                            |                           |                         |          |
| ≤ 1.50<br>30                                                                            |                            | > 1.50<br>6               |                         | ≤ 1.50<br>72                                                                               |                            | > 1.50<br>11              |                         | 0.62     |
| Collaboration with a veterinarian                                                       |                            |                           |                         |                                                                                            |                            |                           |                         |          |
| Yes<br>32                                                                               |                            | No<br>4                   |                         | Yes<br>69                                                                                  |                            | No<br>14                  |                         | 0.42     |
| Total visits made annually by veterinarians to the herd during the preceding season     |                            |                           |                         |                                                                                            |                            |                           |                         |          |
| ≤ 4<br>14                                                                               | 5 - 7<br>6                 |                           | > 7<br>16               | ≤ 4<br>37                                                                                  | 5 - 7<br>19                |                           | > 7<br>27               | 0.44     |
| Clinical mastitis annual incidence risk in the herd                                     |                            |                           |                         |                                                                                            |                            |                           |                         |          |
| ≤ 0.50%<br>11                                                                           |                            | > 0.50%<br>25             |                         | ≤ 0.50%<br>37                                                                              |                            | > 0.50%<br>46             |                         | 0.15     |
| Age of kid removal from their dams                                                      |                            |                           |                         |                                                                                            |                            |                           |                         |          |
| < 45 days<br>12                                                                         | 45–60 days<br>11           |                           | > 60 days<br>13         | < 45 days<br>14                                                                            | 45–60 days<br>33           |                           | > 60 days<br>36         | 0.13     |
| Daily number of milking sessions                                                        |                            |                           |                         |                                                                                            |                            |                           |                         |          |
| 1<br>0                                                                                  | 2<br>33                    | 3<br>3                    | 1<br>4                  | 2<br>75                                                                                    | 3<br>4                     |                           |                         | 0.32     |

|                                                                                               |                                                |                         |                         |                           |                         |
|-----------------------------------------------------------------------------------------------|------------------------------------------------|-------------------------|-------------------------|---------------------------|-------------------------|
| <b>Duration of the dry-period</b>                                                             |                                                |                         |                         |                           |                         |
| ≤ 2 months<br>16                                                                              |                                                | > 2 months<br>20        | ≤ 2 months<br>23        | > 2 months<br>60          | 0.07                    |
| <b>Means of calculating live bodyweight for the administration of pharmaceutical products</b> |                                                |                         |                         |                           |                         |
| Weighing<br>6                                                                                 |                                                | Estimation<br>30        | Weighing<br>21          | Estimation<br>62          | 0.30                    |
| <b>Routine overdosing (compared to dose prescribed) of pharmaceuticals</b>                    |                                                |                         |                         |                           |                         |
| Yes<br>7                                                                                      |                                                | No<br>29                | Yes<br>19               | No<br>64                  | 0.68                    |
| <b>Annual frequency of systemic disinfections in the farm</b>                                 |                                                |                         |                         |                           |                         |
| 0 – 1 occasion<br>7                                                                           | 2- 10 occasions<br>20                          | > 10 occasions<br>9     | 0 – 1 occasion<br>26    | 2- 10 occasions<br>56     | > 10 occasions<br>1     |
| <b>Routine administration of antimicrobials in newborns</b>                                   |                                                |                         |                         |                           |                         |
| Yes<br>14                                                                                     |                                                | No<br>22                | Yes<br>16               | No<br>67                  | 0.024                   |
| <b>Vaccination against mastitis</b>                                                           |                                                |                         |                         |                           |                         |
| Yes<br>12                                                                                     |                                                | No<br>24                | Yes<br>23               | No<br>60                  | 0.54                    |
| <b>Administration of ‘dry-ewe’ treatment at the end of the lactation period</b>               |                                                |                         |                         |                           |                         |
| Yes<br>9                                                                                      |                                                | No<br>27                | Yes<br>6                | No<br>77                  | 0.007                   |
| <b>Use of teat disinfection after milking</b>                                                 |                                                |                         |                         |                           |                         |
| Yes<br>6                                                                                      |                                                | No<br>30                | Yes<br>6                | No<br>77                  | 0.12                    |
| <b>Age of the farmer</b>                                                                      |                                                |                         |                         |                           |                         |
| Up to 50 years<br>24                                                                          |                                                | Over 50 years<br>12     | Up to 50 years<br>49    | Over 50 years<br>34       | 0.43                    |
| <b>Length of previous animal farming experience of the farmer</b>                             |                                                |                         |                         |                           |                         |
| ≤ 5 years<br>11                                                                               |                                                | > 5 years<br>25         | ≤ 5 years<br>13         | > 5 years<br>70           | 0.06                    |
| <b>Education of the farmer</b>                                                                |                                                |                         |                         |                           |                         |
| Primary education<br>5                                                                        | Secondary or post-secondary<br>education<br>25 | Tertiary education<br>6 | Primary education<br>15 | Secondary education<br>64 | Tertiary education<br>4 |
|                                                                                               |                                                |                         |                         |                           | 0.10-                   |

| Farmer by profession                  |    |     |    |       |
|---------------------------------------|----|-----|----|-------|
| Yes                                   | No | Yes | No |       |
| 27                                    | 9  | 78  | 5  | 0.003 |
| Family tradition in farming           |    |     |    |       |
| Yes                                   | No | Yes | No |       |
| 29                                    | 7  | 75  | 8  | 0.14  |
| Presence of working staff in the herd |    |     |    |       |
| Yes                                   | No | Yes | No |       |
| 16                                    | 20 | 18  | 65 | 0.012 |

**Table S7.** Results of univariable analysis for association with isolation of multi-resistant staphylococcal isolates from the bulk-tank milk of 119 goat herds in Greece.

| Isolation of multi-resistant staphylococcal isolates from the bulk-tank milk<br>( <i>n</i> = 19) |                                              |                     |                         | No isolation of multi-resistant staphylococcal isolates from the bulk-tank milk<br>( <i>n</i> = 100) |                                              |                      |                         | <i>p</i> |
|--------------------------------------------------------------------------------------------------|----------------------------------------------|---------------------|-------------------------|------------------------------------------------------------------------------------------------------|----------------------------------------------|----------------------|-------------------------|----------|
| Management system applied in the herd                                                            |                                              |                     |                         |                                                                                                      |                                              |                      |                         |          |
| Intensive<br>4                                                                                   | Semi-intensive<br>5                          | Semi-extensive<br>8 | Extensive<br>2          | Intensive<br>5                                                                                       | Semi-intensive<br>24                         | Semi-extensive<br>53 | Extensive<br>18         | 0.09     |
| Clinical mastitis annual incidence risk in the herd                                              |                                              |                     |                         |                                                                                                      |                                              |                      |                         |          |
| ≤ 0.50%<br>6                                                                                     |                                              | > 0.50%<br>13       |                         | ≤ 0.50%<br>42                                                                                        |                                              | > 0.50%<br>58        |                         | 0.40     |
| Duration of the dry-period                                                                       |                                              |                     |                         |                                                                                                      |                                              |                      |                         |          |
| ≤ 2 months<br>8                                                                                  |                                              | > 2 months<br>11    |                         | ≤ 2 months<br>32                                                                                     |                                              | > 2 months<br>68     |                         | 0.39     |
| Annual frequency of systemic disinfections in the farm                                           |                                              |                     |                         |                                                                                                      |                                              |                      |                         |          |
| 0 – 1 occasion<br>3                                                                              | 2- 10 occasions<br>9                         |                     | > 10 occasions<br>7     | 0 – 1 occasion<br>30                                                                                 | 2- 10 occasions<br>67                        |                      | > 10 occasions<br>3     | <0.0001  |
| Routine administration of antimicrobials in newborns                                             |                                              |                     |                         |                                                                                                      |                                              |                      |                         |          |
| Yes<br>8                                                                                         |                                              | No<br>11            |                         | Yes<br>22                                                                                            |                                              | No<br>78             |                         | 0.06     |
| Administration of ‘dry-ewe’ treatment at the end of the lactation period                         |                                              |                     |                         |                                                                                                      |                                              |                      |                         |          |
| Yes<br>4                                                                                         |                                              | No<br>15            |                         | Yes<br>11                                                                                            |                                              | No<br>89             |                         | 0.23     |
| Use of teat disinfection after milking                                                           |                                              |                     |                         |                                                                                                      |                                              |                      |                         |          |
| Yes<br>2                                                                                         |                                              | No<br>17            |                         | Yes<br>10                                                                                            |                                              | No<br>90             |                         | 0.94     |
| Length of previous animal farming experience of the farmer                                       |                                              |                     |                         |                                                                                                      |                                              |                      |                         |          |
| ≤ 5 years<br>6                                                                                   |                                              | > 5 years<br>13     |                         | ≤ 5 years<br>18                                                                                      |                                              | > 5 years<br>82      |                         | 0.18     |
| Education of the farmer                                                                          |                                              |                     |                         |                                                                                                      |                                              |                      |                         |          |
| Primary education<br>3                                                                           | Secondary and post-secondary education<br>12 |                     | Tertiary education<br>4 | Primary education<br>17                                                                              | Secondary and post-secondary education<br>77 |                      | Tertiary education<br>6 | 0.09     |
| Farmer by profession                                                                             |                                              |                     |                         |                                                                                                      |                                              |                      |                         |          |
| Yes<br>14                                                                                        |                                              | No<br>5             |                         | Yes<br>91                                                                                            |                                              | No<br>9              |                         | 0.030    |

| Family tradition in farming           |    |     |    |       |
|---------------------------------------|----|-----|----|-------|
| Yes                                   | No | Yes | No |       |
| 15                                    | 4  | 89  | 11 | 0.23  |
| Presence of working staff in the herd |    |     |    |       |
| Yes                                   | No | Yes | No |       |
| 10                                    | 9  | 24  | 76 | 0.011 |
